# Supplementary material for: Organic–inorganic halide perovskite/crystalline silicon four-terminal tandem solar cells
Source: Royal Society of Chemistry journal article supplement (doi:10.1039/c4cp03788j), 2014-11-19
Supplement: c4cp03788j1.pdf [file c4cp03788j1.pdf]

## Organic-inorganic halide perovskite / crystalline silicon four-terminal tandem solar cells

Philipp Löper<sup>1</sup>, Soo-Jin Moon<sup>2</sup>, Sílvia Martín de Nicolas<sup>1</sup>, Bjoern Niesen<sup>1</sup>, Martin Ledinsky<sup>1,3</sup>, Sylvain Nicolay<sup>2</sup>, Julien Bailat<sup>2</sup>, Jun-Ho Yum<sup>2</sup>, Stefaan De Wolf<sup>1</sup>, and Christophe Ballif<sup>1,2</sup>

<sup>1</sup> École Polytechnique Fédérale de Lausanne (EPFL), Institute of Microengineering (IMT), Photovoltaics and Thin-Film Electronics Laboratory, Rue de la Maladière 71b, 2002 Neuchâtel, Switzerland.

<sup>2</sup> Centre Suisse d'Électronique et de Microtechnique (CSEM), Jaquet-Droz 1, 2002 Neuchâtel, Switzerland.

<sup>3</sup> Laboratory of Nanostructures and Nanomaterials, Institute of Physics, Academy of Sciences of the Czech Republic, v. v. i., Cukrovárnická 10, 162 00 Prague, Czech Republic

### Supplementary Information

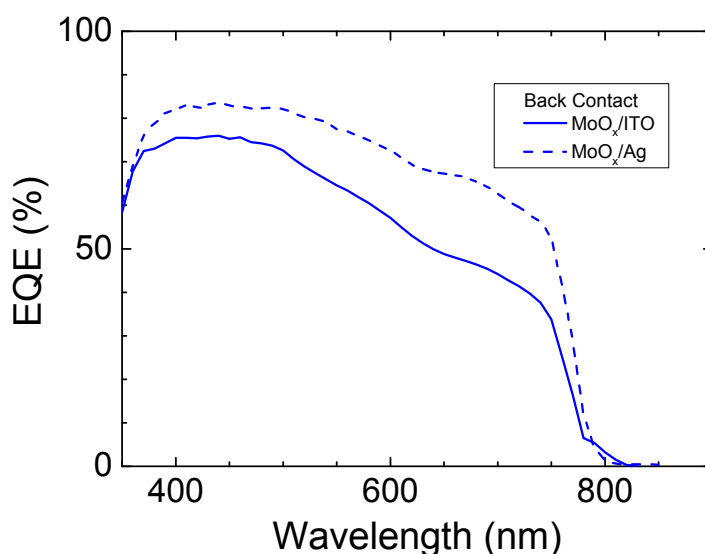

**Fig. S1:** External quantum efficiency (EQE) of  $\text{CH}_3\text{NH}_3\text{PbI}_3$  solar cells with transparent  $\text{MoO}_x/\text{ITO}$  back contact (straight line), and with  $\text{MoO}_x/\text{Ag}$  back contact (dashed line).
